# Supplementary material for: Sulfated zirconia: an efficient solid acid catalyst for esterification of myristic acid with short chain alcohols
Source: Royal Society of Chemistry journal article supplement (doi:10.1039/c2cy20462b), 2012-01-01
Supplement: c2cy20462b.pdf [file c2cy20462b.pdf]

# Supporting Information

for the manuscript

## Sulfated zirconia: an efficient solid acid catalyst for esterification of myristic acid with short chain alcohols

K. Saravanan, Beena Tyagi\* and H. C. Bajaj

Discipline of Inorganic Materials and Catalysis, Council of Scientific and Industrial Research (CSIR), Central Salt and Marine Chemicals Research Institute (CSMCRI), G. B. Marg, Bhavnagar, Gujarat 364 002, India.

Fax: +91-278-2566970

E-mail: [btyagi@csmcri.org](mailto:btyagi@csmcri.org)

### Additional Figures and Figure Captions

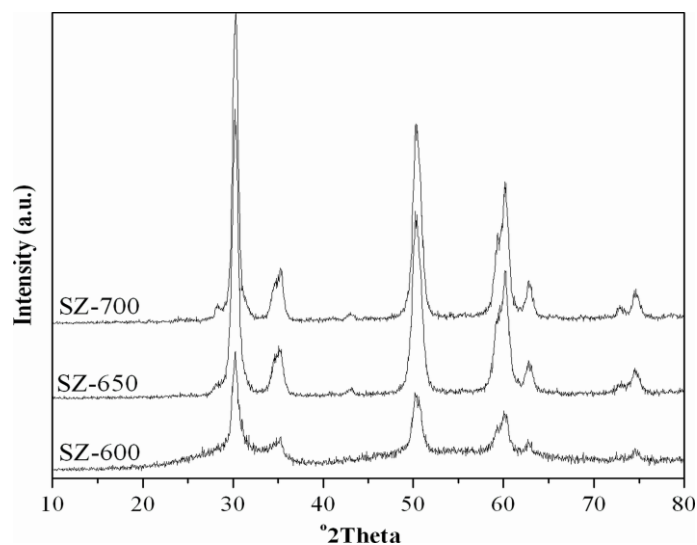

**Figure S1:** PXRD pattern of SZ catalysts calcined at different temperatures

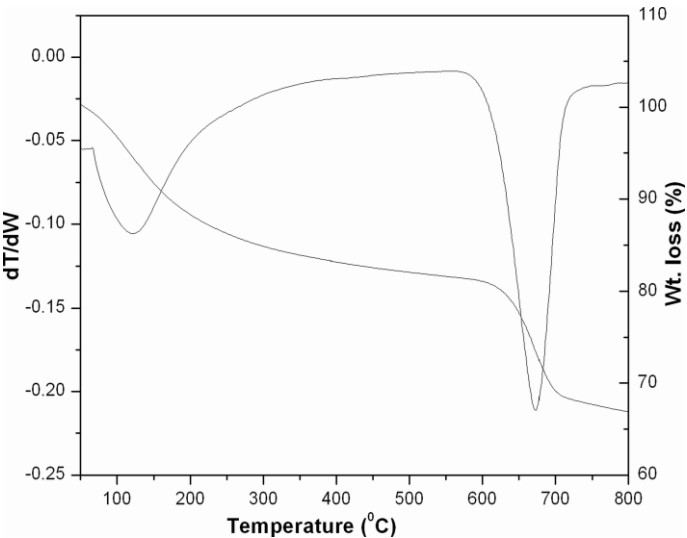

**Figure S2:** TGA and DTA profiles of sulfated zirconia sample

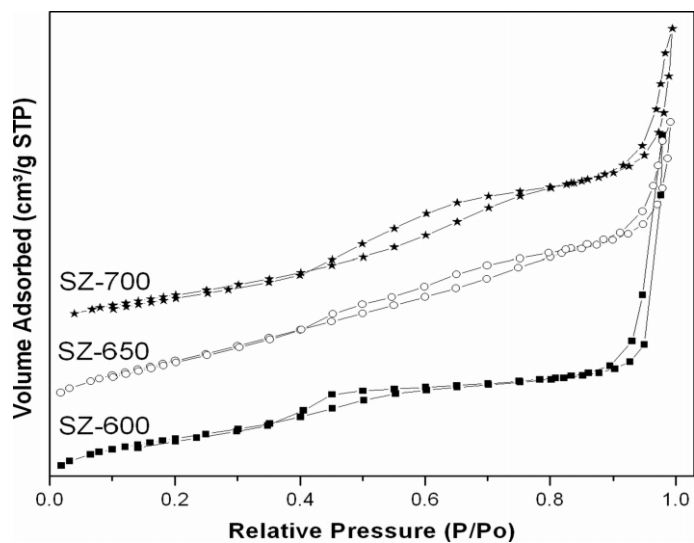

**Figure S3:** Nitrogen adsorption-desorption isotherms of SZ catalysts calcined at different temperatures

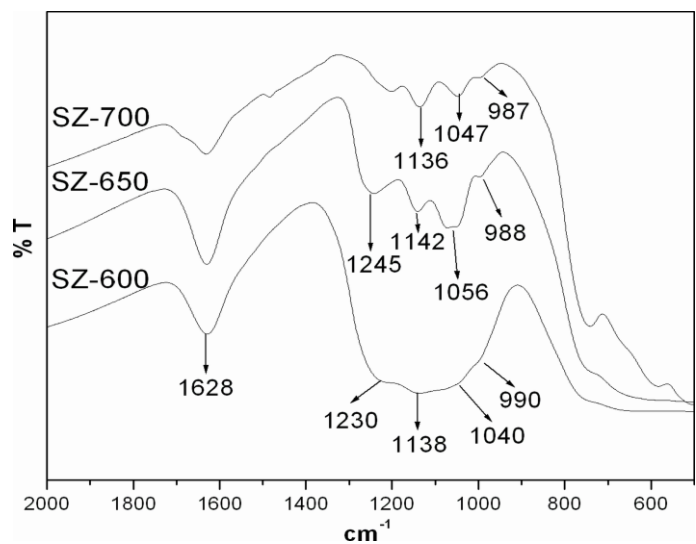

**Figure S4:** IR spectra of SZ catalysts calcined at different temperatures

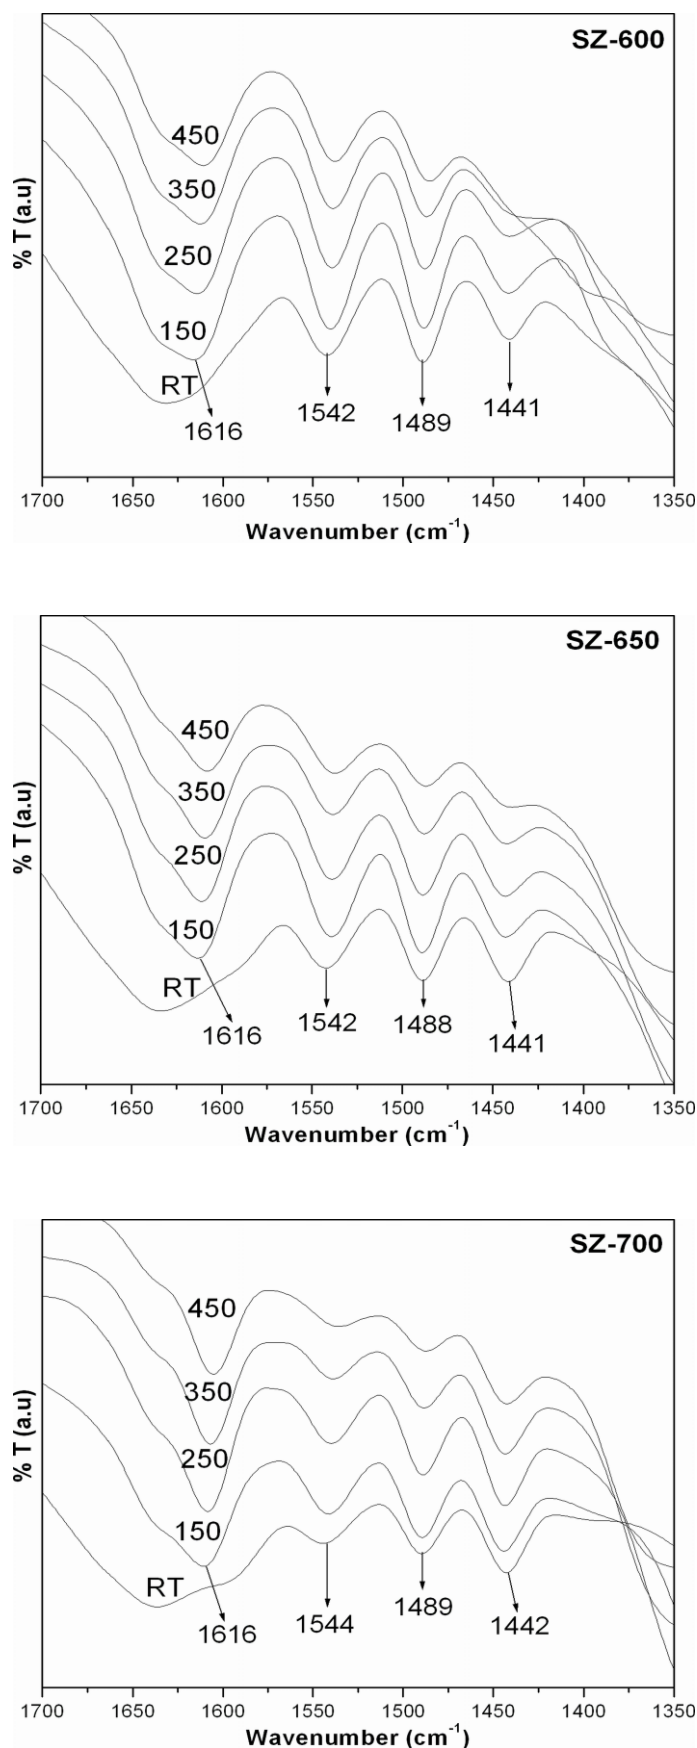

**Figure S5:** DRIFT spectra of SZ catalysts after pyridine desorption at different temperatures (from RT to 450°C)

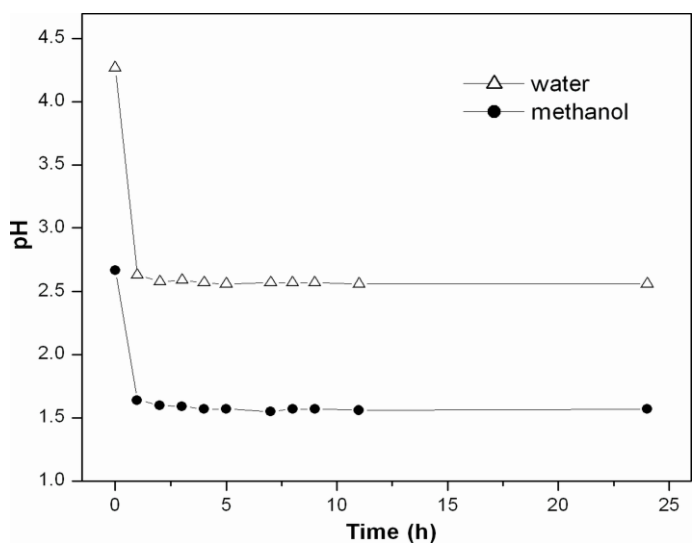

**Figure S6:** pH Vs. time after stirring SZ-600 catalyst in water and methanol

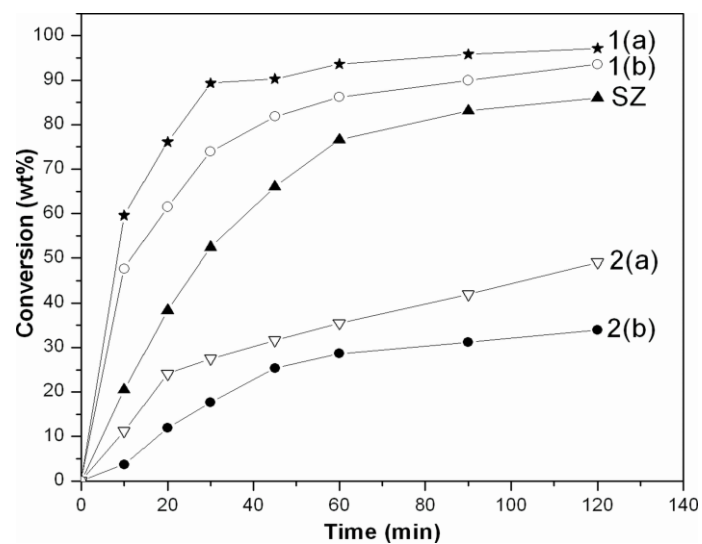

**Figure S7:** Esterification of myristic acid with liquid and solid acid catalysts.  
*Reaction conditions:* acid: methanol=1:10; SZ = 0.5 wt%; 1 = H<sub>2</sub>SO<sub>4</sub>: (a) 0.5 wt% and (b) 0.25 wt%; 2 = Amberlyst-15: (a) 1 wt% and (b) 0.5 wt%
